# Supplementary material
Source: PubMed Central journal article supplement (PMC3271775)
Supplement: supp_pp.111.191379_191379Supplemental_Data.pdf [file supp_pp.111.191379_191379Supplemental_Data.pdf]

# A CCCH-Type Zinc Finger Nucleic Acid-Binding Protein Quantitatively Confers Resistance against Rice Bacterial Blight Disease

Hanqing Deng, Hongbo Liu, Xianghua Li, Jinghua Xiao, and Shiping Wang

## Supplemental Data

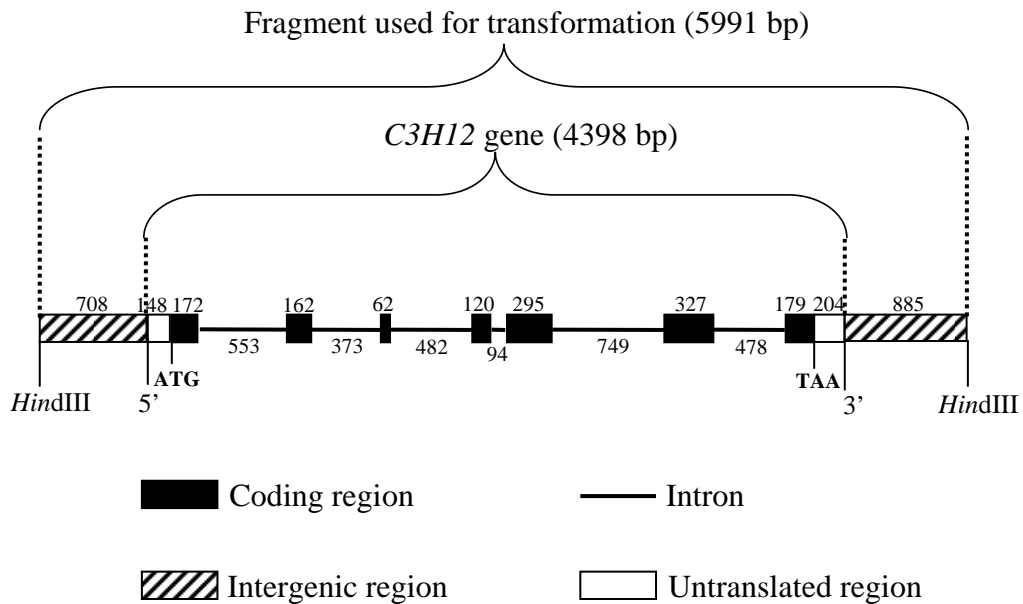

**Supplemental Figure S1.** The structures of *C3H12* gene and rice DNA fragment for transformation.

*C3H12*-overexpressing plants (D74UM; T<sub>0</sub> generation)

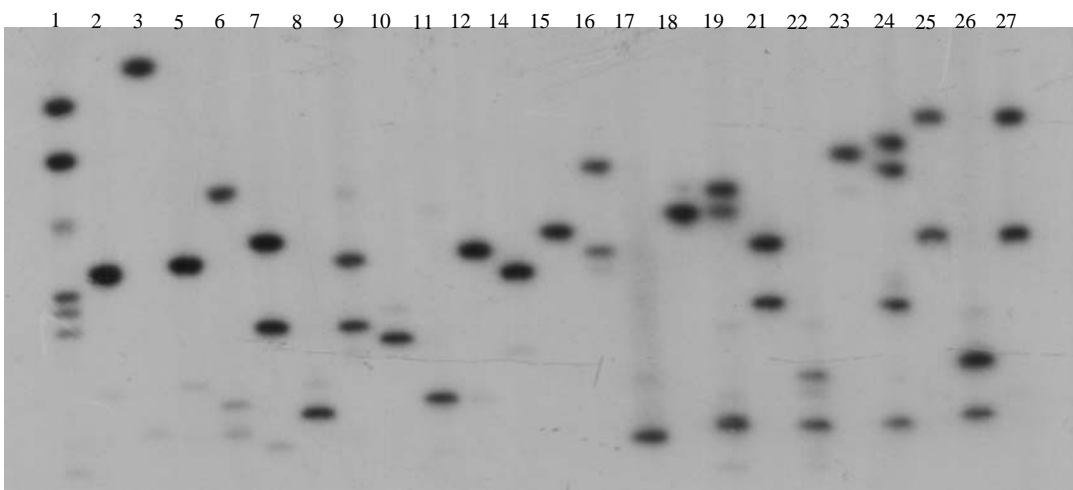

**Supplemental Figure S2.** Southern blot analysis of the copy numbers of transgene *C3H12*.

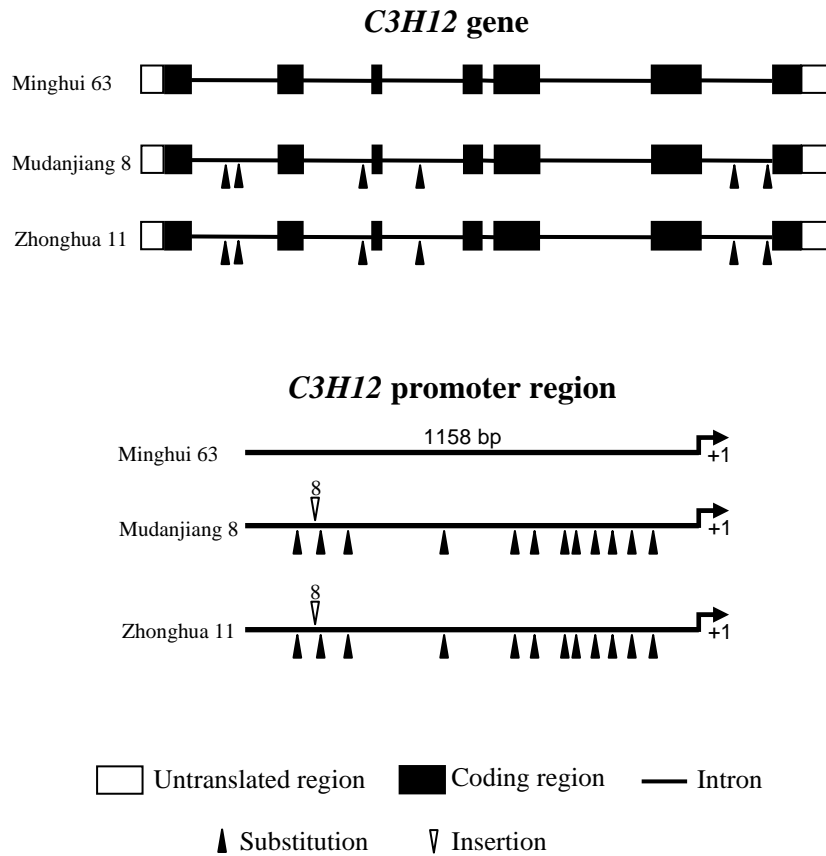

**Supplemental Figure S3.** Sequence comparison of the *C3H12* gene and its promoter region from rice varieties Minghui 63, Mudanjiang 8, and Zhonghua 11. Nucleotide substitution or insertion are identified in different rice varieties with reference to the sequence of Minghui 63. The figure above a triangle indicates the numbers of nucleotides inserted.

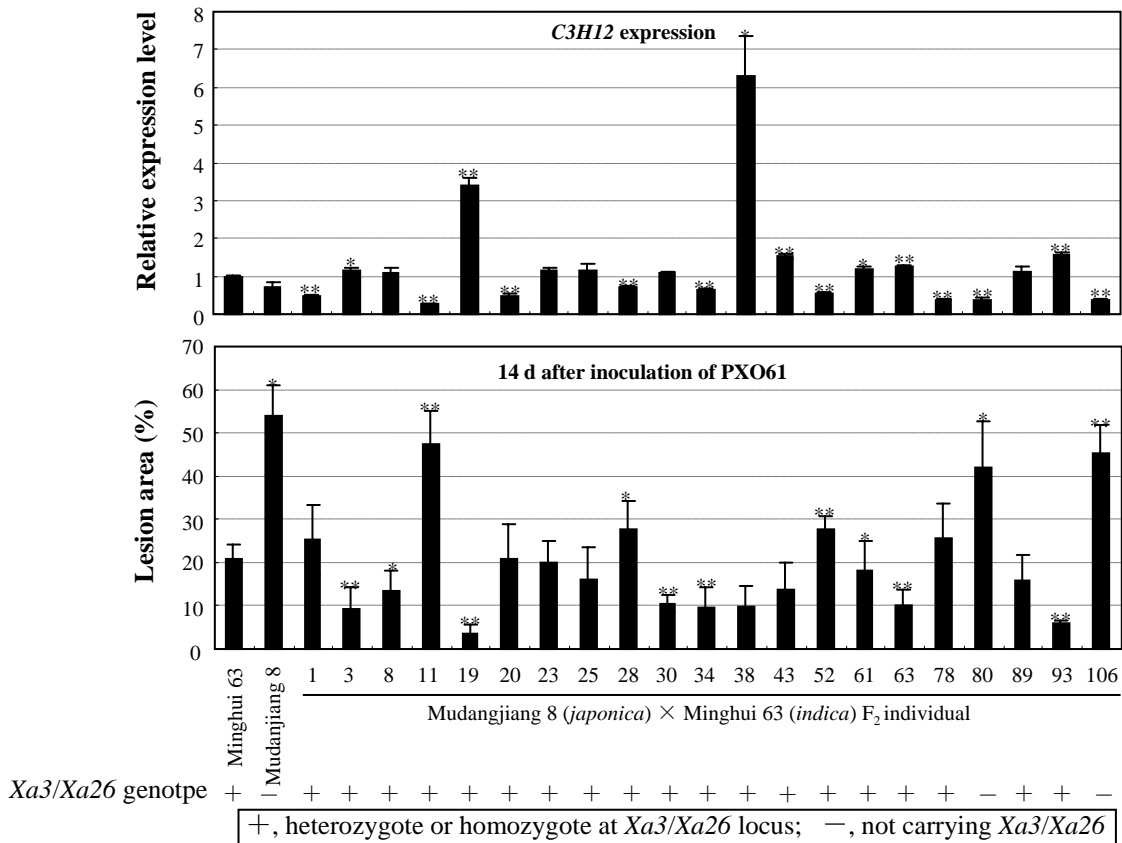

**Supplemental Figure S4.** Relationship of *C3H12* expression level and the resistance level in F<sub>2</sub> plants. Each expression datum represents mean (3 replicates) ± standard deviation. The lesion area and genotype at *Xa3/Xa26* locus were from our previous report (Zhou Y et al. Theor. Appl. Genet. 120:127-138, 2009). Two or one asterisks indicate that a significant difference between an F<sub>2</sub> individual and its resistant parent Minghui 63 was detected at  $P < 0.01$  or  $P < 0.05$ , respectively.

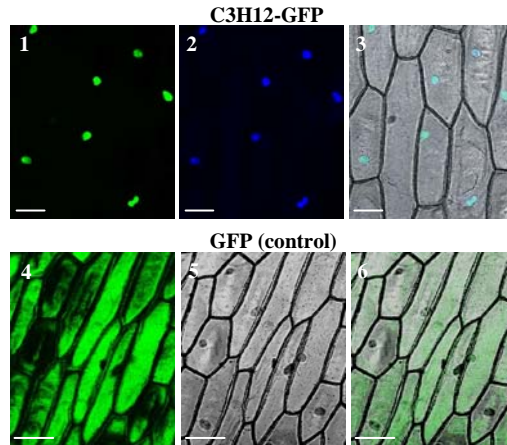

**Supplemental Figure S5.** C3H12 localized in the nuclei of onion epidermal cells. 1, C3H12-GFP expression; 2, staining of nuclei using DAPI as control; 3, transmission image overlain with 1 and 2; 4, GFP expression; 5, transmission image; 6, overlay of 4 and 5. Scale bars: 100  $\mu\text{m}$ .

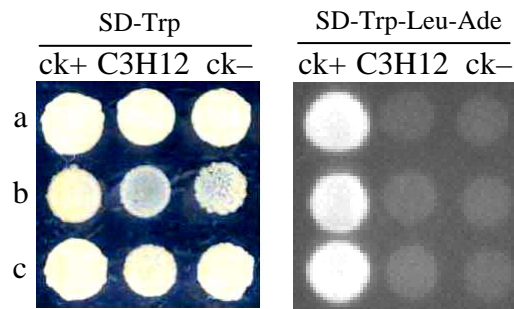

**Supplemental Figure S6.** C3H12 displayed no transactivation activity as compared to the positive control. The transactivation activity was analyzed by growing yeast cells carrying transgene on plates lacking tryptophan (Trp), leucine (Leu), and adenine (Ade). ck+: positive control (rice transcription factor OsbZIP23); ck-: negative control (empty pGBKT7 vector); a, b and c, three replicates (independent clones) for ck+, C3H12, and ck-.

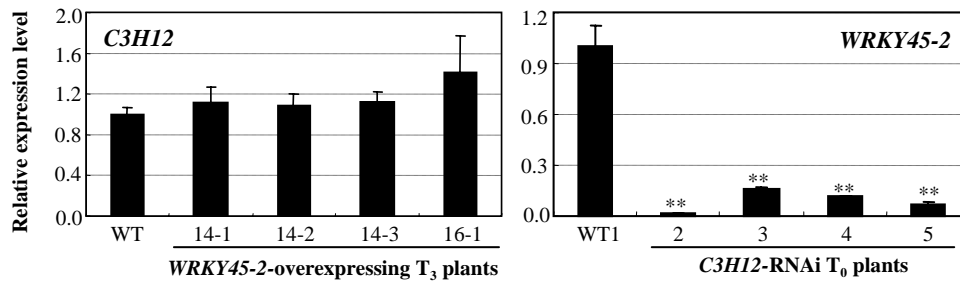

**Supplemental Figure S7.** *C3H12* influenced the expression of defense-responsive gene *WRKY45-2*. Bars represent mean (3 replicates)  $\pm$  standard deviation. Two asterisks indicate that a significant difference between transgenic and wild-type plants was detected at  $P < 0.01$ . WT, wild-type Mudanjiang 8; WT1, wild-type Minghui 63.

**Supplemental Table S1.** Resistance of T<sub>0</sub> *C3H12*-overexpressing plants (D74UM) to *Xoo* strain PXO61 at booting stage<sup>a</sup>

| Rice material            | Lesion area (%) | <i>P</i> | Copy number <sup>b</sup> |
|--------------------------|-----------------|----------|--------------------------|
| Mudanjiang 8 (wild type) | 64.9.0 ± 8.6    |          |                          |
| D74UM1                   | 54.8 ± 12.9     | 0.3143   | 6                        |
| D74UM2                   | 61.0 ± 12.8     | 0.5858   | 1                        |
| D74UM3                   | 43.8 ± 7.6      | 0.0034   | 1                        |
| D74UM4                   | 45.1 ± 12.4     | 0.0215   | –                        |
| D74UM5                   | 48.6 ± 7.5      | 0.0127   | 1                        |
| D74UM6                   | 50.5 ± 7.8      | 0.0240   | 3                        |
| D74UM7                   | 24.0 ± 10.3     | 0.0045   | 2                        |
| D74UM8                   | 47.1 ± 7.2      | 0.0074   | 1                        |
| D74UM9                   | 39.5 ± 12.9     | 0.0196   | 2                        |
| D74UM10                  | 57.0 ± 8.6      | 0.1827   | 1                        |
| D74UM11                  | 53.4 ± 12.0     | 0.1243   | 1                        |
| D74UM12                  | 49.7 ± 5.7      | 0.0132   | 1                        |
| D74UM13                  | 65.7 ± 10.7     | 0.9068   | –                        |
| D74UM14                  | 46.9 ± 7.4      | 0.0075   | 1                        |
| D74UM15                  | 51.5 ± 12.9     | 0.0952   | 1                        |
| D74UM16                  | 38.1 ± 12.5     | 0.0055   | 2                        |
| D74UM17                  | 45.6 ± 11.3     | 0.0184   | 1                        |
| D74UM18                  | 42.1 ± 10.0     | 0.0047   | 1                        |
| D74UM19                  | 36.5 ± 8.3      | 0.0007   | 3                        |
| D74UM20                  | 2.8 ± 2.1       | 0.0000   | –                        |
| D74UM21                  | 46.4 ± 6.8      | 0.0055   | 2                        |
| D74UM22                  | 56.9 ± 5.6      | 0.1241   | 2                        |
| D74UM23                  | 39.9 ± 8.9      | 0.0020   | 1                        |
| D74UM24                  | 51.9 ± 12.3     | 0.0927   | 4                        |
| D74UM25                  | 41.4 ± 5.8      | 0.0014   | 2                        |
| D74UM26                  | 35.7 ± 8.2      | 0.0006   | 2                        |
| D74UM27                  | 51.5 ± 8.1      | 0.0343   | 2                        |

<sup>a</sup>Three to five uppermost fully expanded leaves of each plant were inoculated. Lesion length and leaf length were measured two weeks after inoculation.

<sup>b</sup>The “–” indicates that the copy number of transgene was not analyzed.



**Supplemental Table S2.** PCR primers used for construction of vectors, gene structure analysis, gene mapping, and transgene copy number analysis

| Gene (GenBank accession number) | Primer name                | Forward primer (5'-3')                                       | Reverse primer (5'-3')                               | Product size (nt) | Use                                                                                           |
|---------------------------------|----------------------------|--------------------------------------------------------------|------------------------------------------------------|-------------------|-----------------------------------------------------------------------------------------------|
| <i>C3H12</i><br>(JF799943)      | 38D7RIF/38<br>D7RIR        | GCC <u>ACTAGTGGTACCAAG</u><br>CCCTAGATGGCAGAATC <sup>a</sup> | GCCGAGCTCGGATCCTAG<br>TTGAAGCAGAGCCGTAG <sup>b</sup> | 538               | Amplifying cDNA fragment for constructing RNAi construct                                      |
|                                 | 38D7CF1/3<br>8D7CR         | GAGGATCCATGGTACCGAT<br>GGACGACGCCGGAAG <sup>c</sup>          | GCTGAGCTCGGATCCGGA<br>AGTGTACGCGGATGCGG <sup>d</sup> | 1349              | Amplifying coding region for constructing <i>C3H12-GFP</i> or trans-activation activity assay |
|                                 | 38D7CF2/3<br>8D7CR2        | AAGGATCCATGGACGACG<br>CCGGAAG <sup>d</sup>                   | TTAAGCTTAAGGAAGTGT<br>ACGCGGATGCGG <sup>e</sup>      | 1335              | Amplifying coding region for expressing <i>C3H12</i> protein in <i>Escherichia coli</i>       |
|                                 | MF/GSP1                    | GGGTATGTGGCAGCAGAT<br>GA                                     | ATTTGAGGGATTCTGC                                     | 1507              | Analyzing <i>C3H12</i> -knockout mutant                                                       |
|                                 | 38D7GSP2                   |                                                              | CTCGGTCCGAGTGGAT                                     | 666               | 5'-RACE analysis                                                                              |
|                                 | 38D75UF5/<br>38D7RT5U<br>R | GCCACCGCGCGAGTGAC<br>GT                                      | AGGATATGGTCCAGGTTG                                   | 1050              | Amplifying genomic DNA for sequencing                                                         |
|                                 | 38D7MF/38<br>D75UR         | GGGTATGTGGCAGCAGAT<br>GA                                     | CTCAGGGTATTCTCCTTTC<br>A                             | 572               | Amplifying genomic DNA for sequencing                                                         |
|                                 | 38D7G1/38<br>D7GSP1        | ATTGCCTCTGCCAGAATG<br>AA                                     | ATTTGAGGGATTCTGC                                     | 990               | Amplifying genomic DNA for sequencing                                                         |

|                                     |                       |                                                           |                                              |      |                                                                               |
|-------------------------------------|-----------------------|-----------------------------------------------------------|----------------------------------------------|------|-------------------------------------------------------------------------------|
|                                     | 38D7NPPL/<br>38D7G3   | TTATTCCAAGCCCTAGATG<br>G                                  | GTAGGGTGACAACATTCC<br>CT                     | 967  | Amplifying genomic<br>DNA for sequencing                                      |
|                                     | 38D7G2/38<br>D7stop   | GCCTGTTTCATCTTCTGAG<br>A                                  | GTGGTTTGGGTCACAAC                            | 1008 | Amplifying genomic<br>DNA for sequencing                                      |
|                                     | 38D7dCAP<br>SF/R      | ATCCACTCTTACACCAATT<br>GCTCGA                             | AGAAGTTCCATAGGTTTG<br>TTGAGCC                | 130  | A dCAPS ( <i>Xho</i> I) for<br><i>C3H12</i> mapping                           |
| <i>WRKY45-1</i><br>(GQ331930)       | w45F6/w45<br>R6       | ATCACAAAGCATAGCATCA<br>TCT                                | CTCAGCACCTCCTCCTGG<br>TCGG                   |      | Identifying different<br>alleles of <i>WRKY45</i> in F <sub>2</sub><br>plants |
| <i>WRKY45-2</i><br>(GQ331927)       |                       |                                                           |                                              |      |                                                                               |
| <i>OsZIP23</i><br>(AK072062)        | OsZIP23F/<br>OsZIP23R | TAAC <u>CCATGG</u> GAGATGGATT<br>TCCGGGAGGGA <sup>f</sup> | TAAGGATCCTGGACCCGT<br>CAGAGTCCT <sup>d</sup> | 1087 | Amplifying coding<br>region for<br>trans-activation activity<br>assay         |
| Agrobacterium<br>T-DNA              | LBT1                  |                                                           | CTCGTCCGAGGGCAAAGA<br>AATAGAGTAGA            |      | Analyzing<br><i>C3H12</i> -knockout mutant                                    |
| <i>Hpt</i> <sup>g</sup><br>(V01499) | hptF/htpR             | CGTCTGCTGCTCCATACAA<br>G                                  | GAGCCTGACCTATTGCATC<br>TC                    | 583  | Amplifying <i>Hpt</i> fragment<br>for DNA gel blot analysis                   |

<sup>a</sup>The underlined nucleotides are the digestion site of *Spe*I and the double underlined nucleotides are the digestion site of *Kpn*I.

<sup>b</sup>The underlined nucleotides are the digestion site of *Sac*I and the double underlined nucleotides are the digestion site of *Bam*HI.

<sup>c</sup>The underlined nucleotides are the digestion site of *Nco*I and the nucleotides showing in italic are the digestion site of *Kpn*I.

<sup>d</sup>The underlined nucleotides are the digestion site of *Bam*HI.

<sup>e</sup>The underlined nucleotides are the digestion site of *Hind*III.

<sup>f</sup>The underlined nucleotides are the digestion site of *Nco*I.

<sup>g</sup>*Hpt*, hygromycin phosphotransferase gene.

**Supplemental Table S3.** Primers used for quantitative PCR in gene expression analysis

| Gene (GenBank accession number)        | Primer name           | Forward primer (5'-3')        | Reverse primer (5'-3')      | Product size (nt) |
|----------------------------------------|-----------------------|-------------------------------|-----------------------------|-------------------|
| <i>C3H12</i><br>(JF799943)             | 38D7RT1F/<br>38D7RT1R | ACCGAGTGAAAAGGAGTGTGCAT<br>AT | AAGCCATAGCATTGAAAAGTTCTGG   | 100               |
| <i>AOS2</i><br>(AY062258) <sup>d</sup> | AOS2-F/R              | CAATACGTGTACTGGTCGAATGG       | AAGGTGTCGTACCGGAGGAA        | 120               |
| <i>LOX</i><br>(D14000)                 | LOX-F/R               | GCATCCCCAACAGCACATC           | AATAAAGATTTGGGAGTGACATATTGG | 110               |
| <i>PR5</i><br>(X68197)                 | PR5-F/R               | CAACAGCAACTACCAAGTCGTCTT      | CAAGGTGTCGTTTTATTCATCAAC    | 130               |
| <i>PR10</i><br>(D38170)                | PR10-F/R              | CCCTGCCGAATACGCCTAA           | CTCAAACGCCACGAGAATTTG       | 120               |
| <i>Cht1</i><br>(D16221)                | Cht1-F/R              | CGTGGTGACCAACATCATCA          | GAGTTGAAAGGCCTCTGGTTGT      | 120               |
| <i>PAL1</i><br>(X16099)                | PAL-F/R               | AGCACATCTTGGAGGGAAGCT         | GCGCGGATAACCTCAATTTG        | 120               |
| <i>ICS1</i><br>(AK120689)              | ICS1-F/R              | TATGGTGCTATCCGCTTCGAT         | CGAGAACCGAGCTCTCTTCAA       | 120               |
| <i>PAD4</i><br>(CX118864)              | PAD4-F/R              | GCCAGCTCCCCTACGACTTC          | CGTGTGCCGGTGTAGGTTGTT       | 120               |
| <i>PR1a</i><br>(AJ278436)              | PR1a-F/R              | CGTCTTCATCACCTGCAACTACTC      | CATGCATAAACACGTAGCATAGC     | 130               |
| <i>NH1</i><br>(AY923983)               | NH1-F/R               | CACGCCTAAGCCTCGGATTA          | TCAGTGAGCAGCATCCTGACTAG     | 120               |
| <i>OsDR10</i><br>(CX109127)            | OsDR10-F/<br>R        | TCATCAAGCTGATTCATCAGACA       | CGTACTTGTAGAACGCCATGGA      | 120               |
| <i>WRKY62</i><br>(DQ298182)            | OsWRKY6<br>2-F/R      | ATGGACGACGACGGCGACGGCT        | GCGGTTCGGCGGCTGCTGTCTC      | 476               |

|                                             |                        |                       |                          |     |
|---------------------------------------------|------------------------|-----------------------|--------------------------|-----|
| <i>NRR</i><br>(AY846391)                    | NRR-F/R                | CGGGTGCTCACGGATTACAA  | AGCGATTGATTAACCAGGTCTCAC | 120 |
| <i>TGA2.1</i><br>(AB051295)                 | TGA2.1-F/<br>R         | TAGCTGCAAAGGCCGATGT   | AAGCTCAGATGGACGGAAACC    | 120 |
| <i>PLD<math>\beta</math>1</i><br>(AJ419630) | OsPLD $\beta$<br>1-F/R | TCTTTTGTCTTGGCAATCGTG | CTGGATAGTTGAAGCCTTCCT    | 342 |
| <i>Actin</i><br>(X15865)                    | Actin-F/R              | TGTATGCCAGTGGTCGTACCA | CCAGCAAGGTCGAGACGAA      | 121 |

---
